# Supplementary material
Source: publisher site journal article supplement (https://www.dovepress.com/article/430376)
Supplement: Supplementary file 1 [file get_supplementary_file.php]

**Annex 1: WHOQOL-HIV Bref**

**ABOUT YOU**

Before you begin we would like to ask you to answer a few general questions about yourself: by circling the correct answer or by filling in the space provided.

What is your **gender**? Male / Female

How old are you? (age in years)

What is the highest **education** you received? None at all / Primary / Secondary / Tertiary

What is your **marital status**? Single / Married/ Living as married / Separated / Divorced / Widowed

How is your **health**? Very Poor / Poor / Neither Poor nor Good / Good / Very Good

Do you consider yourself currently ill? Yes / No

If there is something wrong with you, what do you think it is?

**Please respond to the following questions if they are applicable to you:**

What is your **HIV serostatus**? Asymptomatic / Symptomatic / AIDS converted

In what year did you first **test positive** for HIV?

In what year do you think you were infected?

How do you believe you were **infected with HIV**? (circle one only):

Sex with a man / Sex with a woman / Injecting drugs / Blood products / Other (specify)\_\_\_\_\_

**Instructions**

This assessment asks how you feel about your quality of life, health, or other areas of your life. **Please answer all the questions.** If you are unsure about which response to give to a question, **please choose the one** that appears most appropriate. This can often be your first response. Please keep in mind your standards, hopes, pleasures and concerns. We ask that you think about your life **in the last two weeks**. For example, thinking about the last two weeks, a question might ask:

|          |                                       | Not at all | A little | A moderate amount | very much | Extremely |
|----------|---------------------------------------|------------|----------|-------------------|-----------|-----------|
| 1 (F5.3) | How well are you able to concentrate? | 1          | 2        | 3                 | 4         | 5         |

You should circle the number that best fits how well are you able to concentrate over the last two weeks. So you would circle the number 4 if you were able to concentrate very much. You would circle number 1 if you were not able to concentrate at all in the last two weeks.

**Please read each question, assess your feelings, and circle the number on the scale for each question that gives the best answer for you.**

|       |                                          | Very poor | Poor | Neither poor not good | Good | Very good |
|-------|------------------------------------------|-----------|------|-----------------------|------|-----------|
| 1(G1) | How would you rate your quality of life? | 1         | 2    | 3                     | 4    | 5         |

|        |                                         | Very dissatisfied | Dissatisfied | Neither satisfied nor dissatisfied | Satisfied | Very satisfied |
|--------|-----------------------------------------|-------------------|--------------|------------------------------------|-----------|----------------|
| 2 (G4) | How satisfied are you with your health? | 1                 | 2            | 3                                  | 4         | 5              |

The following questions ask about **how much** you have experienced certain things in the last two weeks.

|           |                                                                                            | Not at all | A little | A moderate amount | Very much | An extreme amount |
|-----------|--------------------------------------------------------------------------------------------|------------|----------|-------------------|-----------|-------------------|
| 3 (F1.4)  | To what extent do you feel that physical pain prevents you from doing what you need to do? | 1          | 2        | 3                 | 4         | 5                 |
| 4(F50.1)  | How much are you bothered by any physical problems related to your HIV infection?          | 1          | 2        | 3                 | 4         | 5                 |
| 5 (F11.3) | How much do you need any medical treatment to function in your daily life?                 | 1          | 2        | 3                 | 4         | 5                 |
| 6 (F4.1)  | How much do you enjoy life?                                                                | 1          | 2        | 3                 | 4         | 5                 |
| 7 (F24.2) | To what extent do you feel your life to be meaningful?                                     | 1          | 2        | 3                 | 4         | 5                 |
| 8 (F52.2) | To what extent are you bothered by people blaming you for your HIV status                  | 1          | 2        | 3                 | 4         | 5                 |
| 9 (F53.4) | How much do you fear the future?                                                           | 1          | 2        | 3                 | 4         | 5                 |
| 10(F54.1) | How much do you worry about death?                                                         | 1          | 2        | 3                 | 4         | 5                 |

|           |                                           | Not at all | A little | A moderate amount | Very much | Extremely |
|-----------|-------------------------------------------|------------|----------|-------------------|-----------|-----------|
| 11 (F5.3) | How well are you able to concentrate?     | 1          | 2        | 3                 | 4         | 5         |
| 12(F16.1) | How safe do you feel in your daily life?  | 1          | 2        | 3                 | 4         | 5         |
| 13(F22.1) | How healthy is your physical environment? | 1          | 2        | 3                 | 4         | 5         |

The following questions ask about **how completely** you experience or were able to do certain things in the last two weeks.

|  |  | Not at all | A little | Moderately | Mostly | Completely |
|--|--|------------|----------|------------|--------|------------|
|  |  |            |          |            |        |            |

|           |                                                                                |   |   |   |   |   |
|-----------|--------------------------------------------------------------------------------|---|---|---|---|---|
| 14 (F2.1) | Do you have enough energy for everyday life?                                   | 1 | 2 | 3 | 4 | 5 |
| 15 (F7.1) | Are you able to accept your bodily appearance?                                 | 1 | 2 | 3 | 4 | 5 |
| 16(F18.1) | Have you enough money to meet your needs?                                      | 1 | 2 | 3 | 4 | 5 |
| 17(F51.1) | To what extent do you feel accepted by the people you know?                    | 1 | 2 | 3 | 4 | 5 |
| 18(F20.1) | How available to you is the information that you need in your day-to-day life? | 1 | 2 | 3 | 4 | 5 |
| 19(F21.1) | To what extent do you have the opportunity for leisure activities?             | 1 | 2 | 3 | 4 | 5 |

|          |                                      |           |      |                       |      |           |
|----------|--------------------------------------|-----------|------|-----------------------|------|-----------|
|          |                                      | Very poor | Poor | Neither poor not good | Good | Very good |
| 20(F9.1) | How well are you able to get around? | 1         | 2    | 3                     | 4    | 5         |

The following questions ask you how **good or satisfied** you have felt about various aspects of your life over the last two weeks.

|           |                                                                                  | Very dissatisfied | Dissatisfied | Neither satisfied nor dissatisfied | Satisfied | Very satisfied |
|-----------|----------------------------------------------------------------------------------|-------------------|--------------|------------------------------------|-----------|----------------|
| 21 (F3.3) | How satisfied are you with your sleep?                                           | 1                 | 2            | 3                                  | 4         | 5              |
| 22(F10.3) | How satisfied are you with your ability to perform your daily living activities? | 1                 | 2            | 3                                  | 4         | 5              |
| 23(F12.4) | How satisfied are you with your capacity for work?                               | 1                 | 2            | 3                                  | 4         | 5              |
| 24 (F6.3) | How satisfied are you with yourself?                                             | 1                 | 2            | 3                                  | 4         | 5              |
| 25(F13.3) | How satisfied are you with your personal relationships?                          | 1                 | 2            | 3                                  | 4         | 5              |
| 26(F15.3) | How satisfied are you with your sex life?                                        | 1                 | 2            | 3                                  | 4         | 5              |
| 27(F14.4) | How satisfied are you with the support you get from your friends?                | 1                 | 2            | 3                                  | 4         | 5              |
| 28(F17.3) | How satisfied are you with the conditions of your living place?                  | 1                 | 2            | 3                                  | 4         | 5              |
| 29(F19.3) | How satisfied are you with your access to health services?                       | 1                 | 2            | 3                                  | 4         | 5              |
| 30(F23.3) | How satisfied are you with your transport?                                       | 1                 | 2            | 3                                  | 4         | 5              |

The following question refers to **how often** you have felt or experienced certain things in the last two weeks.

|          |                                                                                          | Never | Seldom | Quite often | Very often | Always |
|----------|------------------------------------------------------------------------------------------|-------|--------|-------------|------------|--------|
| 31(F8.1) | How often do you have negative feelings such as blue mood, despair, anxiety, depression? | 1     | 2      | 3           | 4          | 5      |

Did someone help you to fill out this form?  
 How long did it take to fill this form out?  
 Do you have any comments about the assessment?

**Additional questions:**

In which area do you live?                      Urban                      Rural  
 Do you have a Job?                                Yes                              No  
 Are you followed by a psychologist?        Yes                              No  
 Who is informed about your HIV status?    No one                      A family member                      A friend

**THANK YOU FOR YOUR HELP**
